# Supplementary material for: Molecular motifs encoding self-assembly of peptide fibers into molecular gels
Source: Royal Society of Chemistry journal article supplement (doi:10.1039/c9sm01793c), 2019-01-01
Supplement: c9sm01793c1.pdf [file c9sm01793c1.pdf]

## Supporting Information

### Molecular Motifs Encoding Self-Assembly for Peptide Fibers into Molecular Gels

Yaqi Lan,<sup>a</sup> Muwen Lv,<sup>a</sup> Shenglan Guo,<sup>a</sup> Pedram Nasr,<sup>b</sup> Vladimir Ladizansky,<sup>c</sup> Raoul Vas,<sup>c</sup> Maria G. Corradini,<sup>d</sup> Tao Hou,<sup>a</sup> Yong Cao,<sup>a</sup> Saeed M. Ghazani,<sup>b</sup> Alejarando Marnangoni<sup>b</sup> and Michael A. Rogers <sup>\*b</sup>

---

<sup>a</sup> *Guangdong Provincial Key Laboratory of Nutraceuticals and Functional Foods, College of Food Sciences, South China Agricultural University,*

*Guangzhou, Guangdong, P.R. China.*

<sup>b</sup> *Department of Food Science, University of Guelph, Guelph, Ontario N1G 2W1, Canada.*

<sup>c</sup> *Department of Physics, University of Guelph, Guelph, Ontario N1G 2W1, Canada.*

<sup>d</sup> *Arrell Food Institute, University of Guelph, Guelph, Ontario, N1G 2W1, Canada.*

\*Corresponding author

Michael A. Rogers

Department of Food Science, University of Guelph

Guelph, Ontario, N1G2W1

[mroger09@uoguelph.ca](mailto:mroger09@uoguelph.ca)

ph: 519-8240-4120 ext 54327

## **Scanning Colorimetry (DSC)**

### **Methods:**

DSC8000 differential scanning calorimeter (DSC) (Perkin-Elmer, Waltham, MA, USA) was utilized to measure the phase transition of the gels. The DSC chamber was pre-cooled to 20 °C with a nitrogen flush (50ml/min). 6 to 10 mg of gel was sealed in stainless steel pans (Perkin-Elmer, Waltham, MA, USA) with built-in torque for improved seals. Samples were heated to 180 °C at 5 °C/min, then held isothermally for 10 min, and then were cooled down to 20 °C at 5 °C/min. GraphWare software Pyris 11.0 was used to integrate the transition peaks to determine the onset melting temperature.

**Table S1.** Hansen coordinates ( $\text{MP}_a^{1/2}$ ) for the center of the solution, gel and precipitate spheres, as well as the radius ( $\text{MP}_a^{1/2}$ ) for each gelator sphere.

| Gelator No. | Center of solution sphere |            |            |       | Center of gel sphere |            |            |       | Center of precipitate sphere |            |            |       |
|-------------|---------------------------|------------|------------|-------|----------------------|------------|------------|-------|------------------------------|------------|------------|-------|
|             | $2\delta_d$               | $\delta_p$ | $\delta_h$ | R     | $2\delta_d$          | $\delta_p$ | $\delta_h$ | R     | $2\delta_d$                  | $\delta_p$ | $\delta_h$ | R     |
| L-LL        | 33.60                     | 9.60       | 24.00      | 19.51 | 31.60                | 5.70       | 11.80      | 4.62  | 32.80                        | 8.80       | 3.70       | 9.78  |
| L-FF        | 35.40                     | 13.70      | 17.90      | 8.65  | 32.80                | 8.70       | 11.50      | 5.61  | 31.10                        | 8.00       | 21.15      | 22.62 |
| L-YY        | 36.80                     | 9.75       | 17.30      | 12.40 | 31.39                | 13.17      | 23.98      | 18.50 | 33.10                        | 1.55       | 2.85       | 4.10  |
| L-WW        | 35.20                     | 11.70      | 23.80      | 19.33 | NA                   | NA         | NA         | NA    | 30.86                        | 7.86       | 6.43       | 10.15 |
| D-FFF       | 36.10                     | 7.80       | 8.20       | 3.95  | 32.10                | 15.75      | 14.65      | 8.97  | 31.10                        | 8.00       | 21.15      | 22.62 |
| D-FF        | 36.40                     | 9.20       | 15.70      | 10.78 | 31.10                | 12.05      | 11.25      | 7.89  | 31.10                        | 8.00       | 21.15      | 22.62 |
| L-LLL       | 36.40                     | 9.20       | 15.65      | 10.78 | NA                   | NA         | NA         | NA    | 31.10                        | 8.00       | 21.15      | 22.62 |
| L-FFF       | 36.38                     | 9.21       | 15.65      | 10.78 | 31.10                | 12.05      | 11.25      | 7.89  | 31.10                        | 8.00       | 21.15      | 22.62 |
| L-YYY       | 35.20                     | 11.70      | 23.80      | 19.30 | NA                   | NA         | NA         | NA    | 31.90                        | 2.59       | 3.54       | 4.56  |
| L-WWW       | 35.19                     | 11.71      | 23.80      | 19.33 | NA                   | NA         | NA         | NA    | 33.30                        | 1.55       | 2.85       | 4.10  |
| C-L-LL      | 35.90                     | 11.80      | 9.43       | 4.68  | 34.70                | 7.30       | 13.10      | 13.44 | 31.30                        | 8.23       | 21.06      | 22.62 |
| C-L-FF      | NA                        | NA         | NA         | NA    | NA                   | NA         | NA         | NA    | 31.10                        | 8.00       | 21.15      | 22.62 |
| C-L-YY      | 35.90                     | 11.80      | 9.43       | 4.68  | 31.61                | 11.10      | 29.34      | 13.90 | 32.29                        | 5.65       | 12.94      | 14.22 |
| C-L-WW      | 36.40                     | 9.20       | 15.65      | 10.78 | NA                   | NA         | NA         | NA    | 31.10                        | 8.00       | 21.15      | 22.62 |
| C-D-FF      | NA                        | NA         | NA         | NA    | NA                   | NA         | NA         | NA    | 31.10                        | 8.00       | 21.15      | 22.62 |

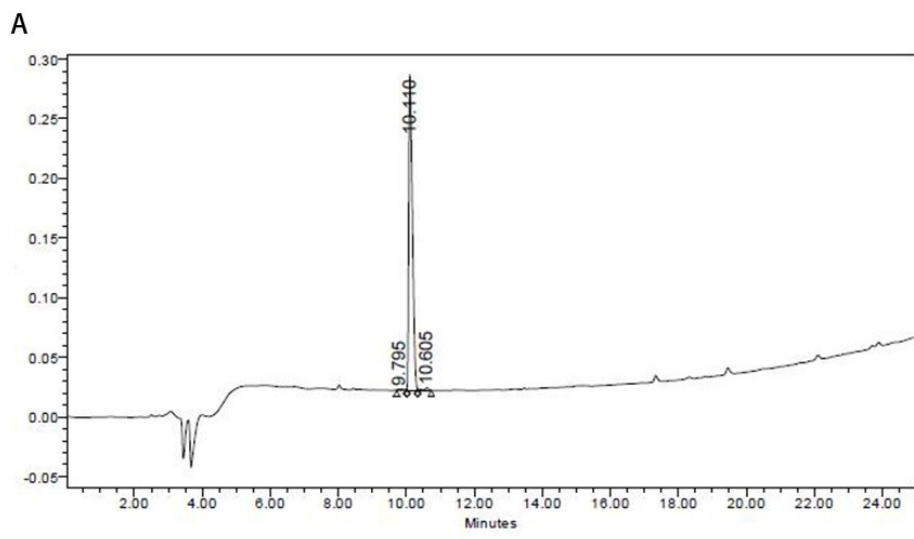

|   | RT     | Area    | % Area | Height |
|---|--------|---------|--------|--------|
| 1 | 9.795  | 12366   | 0.62   | 1175   |
| 2 | 10.110 | 1970510 | 98.29  | 269827 |
| 3 | 10.605 | 22006   | 1.10   | 1907   |

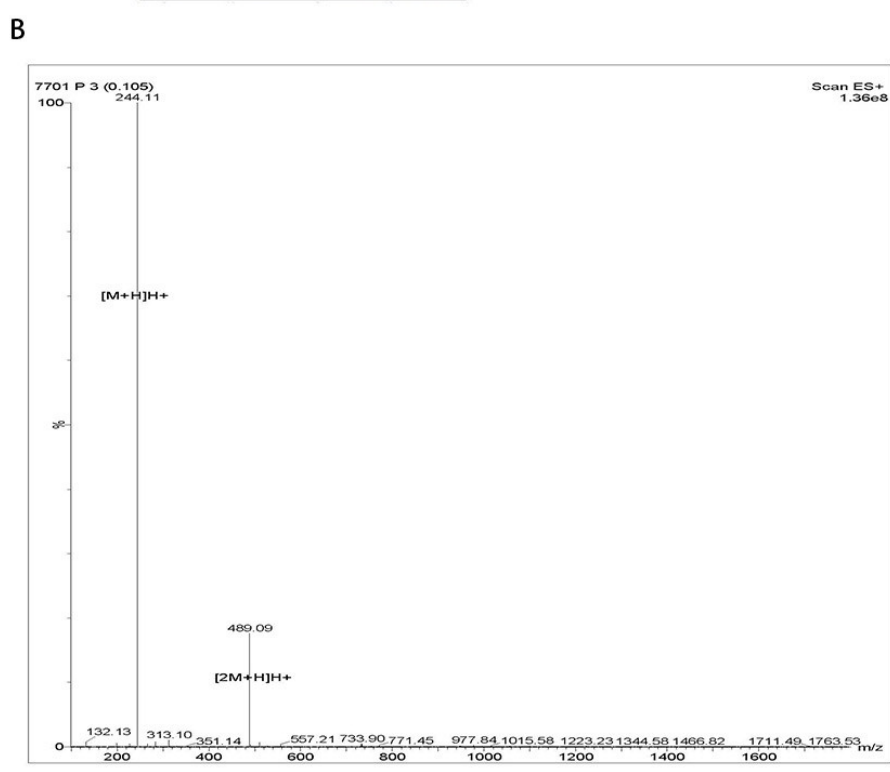

Figure S1. Analytical HPLC (A) and ESI-MS (B) of gelator<sub>L</sub>-LL.

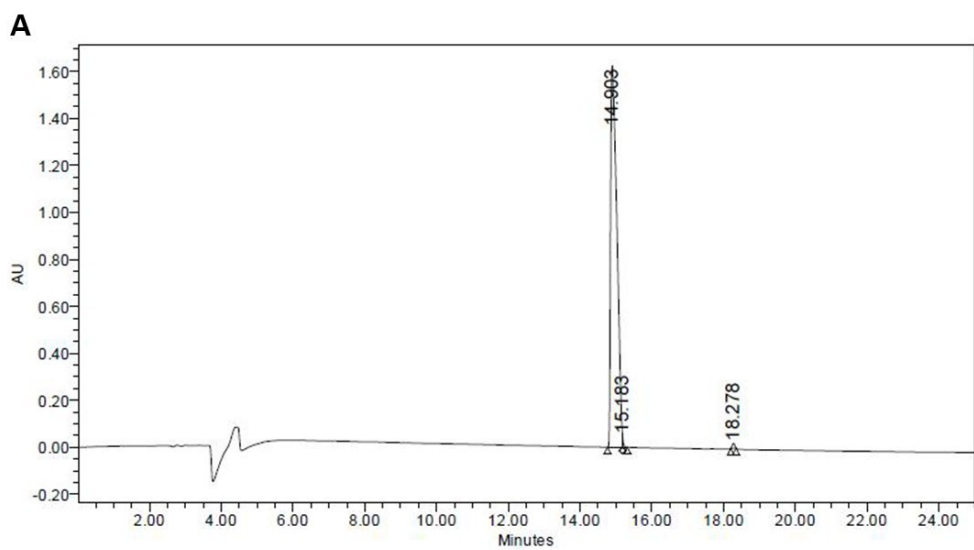

|   | RT     | Area     | % Area | Height  |
|---|--------|----------|--------|---------|
| 1 | 14.903 | 19496384 | 99.13  | 1630341 |
| 2 | 15.183 | 69267    | 0.35   | 47939   |
| 3 | 18.278 | 102335   | 0.52   | 20889   |

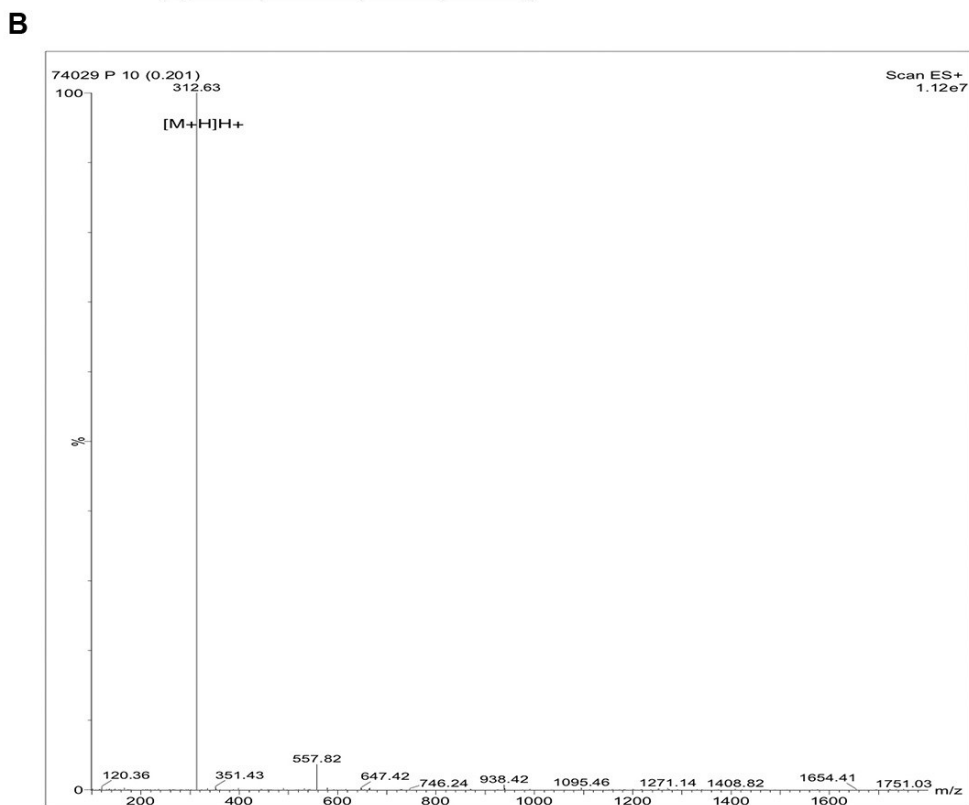

Figure S2. Analytical HPLC (A) and ESI-MS (B) of gelator <sub>L</sub>-FF.

**A**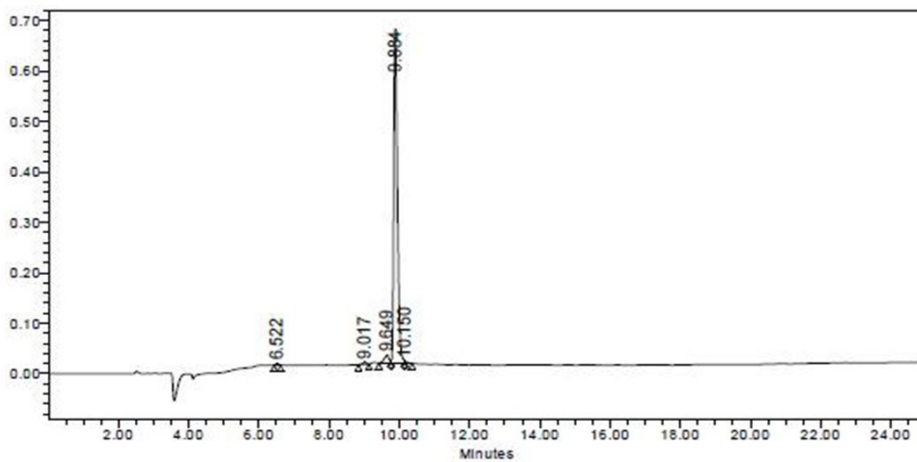

|   | RT     | Area    | % Area | Height |
|---|--------|---------|--------|--------|
| 1 | 6.522  | 21328   | 0.43   | 4277   |
| 2 | 9.017  | 29322   | 0.59   | 4330   |
| 3 | 9.649  | 154966  | 3.11   | 16479  |
| 4 | 9.884  | 4756005 | 95.44  | 661624 |
| 5 | 10.150 | 21416   | 0.43   | 4976   |

**B**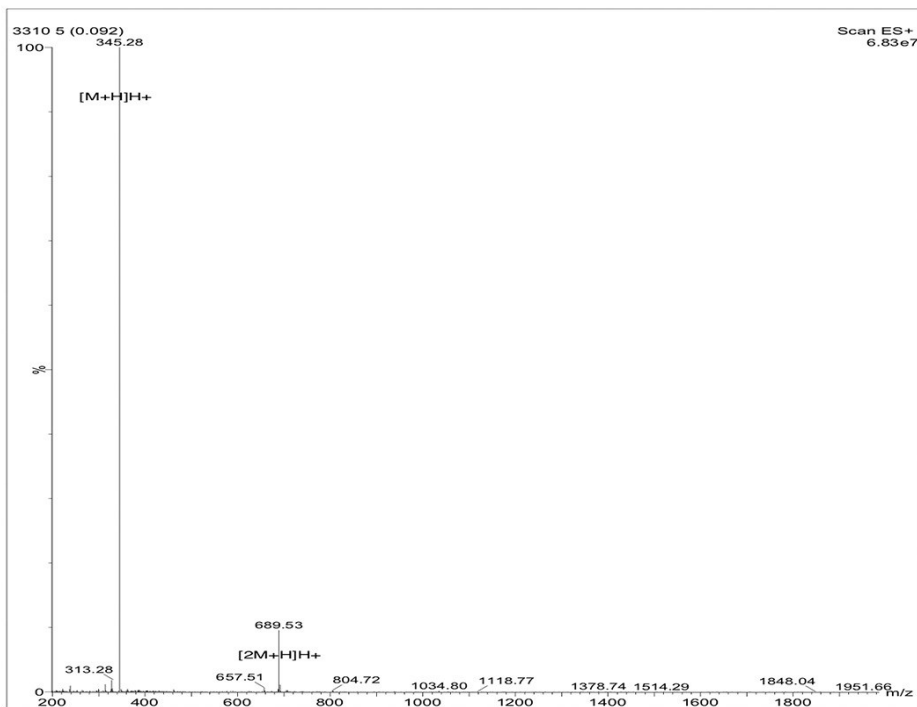

Figure S3. Analytical HPLC (A) and ESI-MS (B) of gelator <sub>L</sub>-YY.

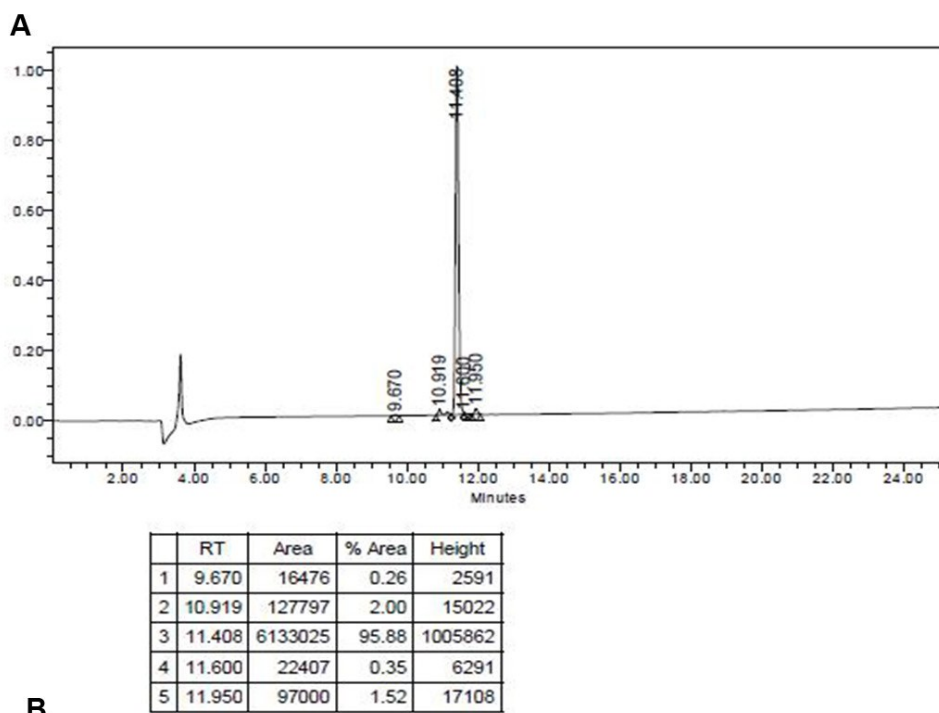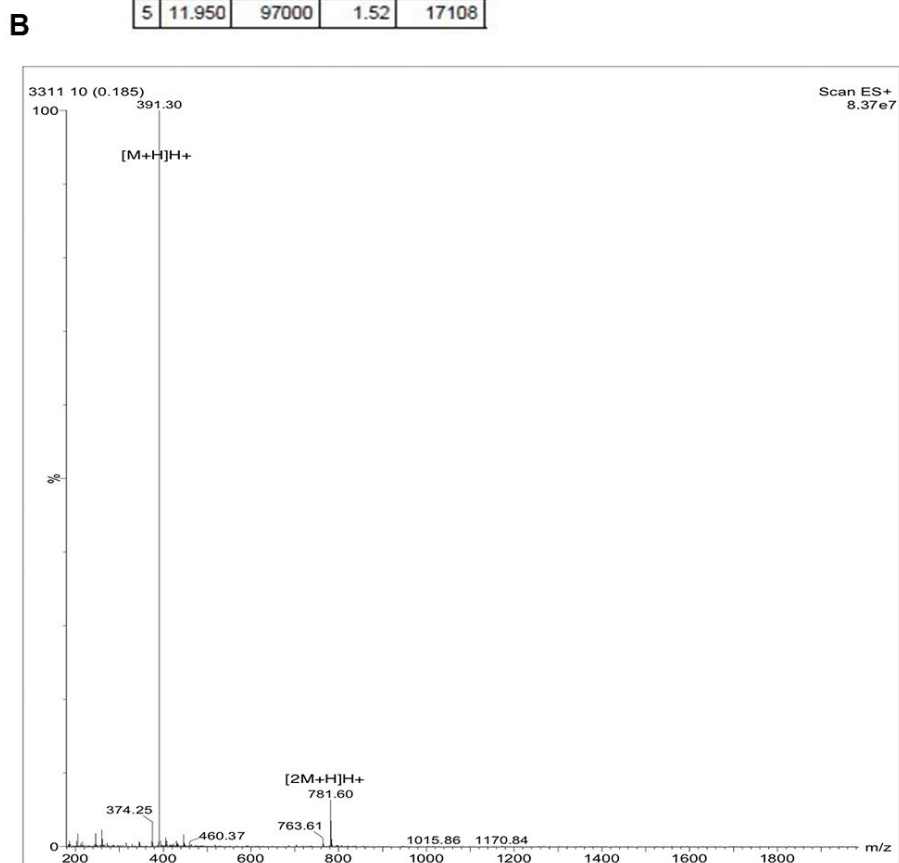

Figure S4. Analytical HPLC (A) and ESI-MS (B) of gelator<sub>L</sub>-WW.

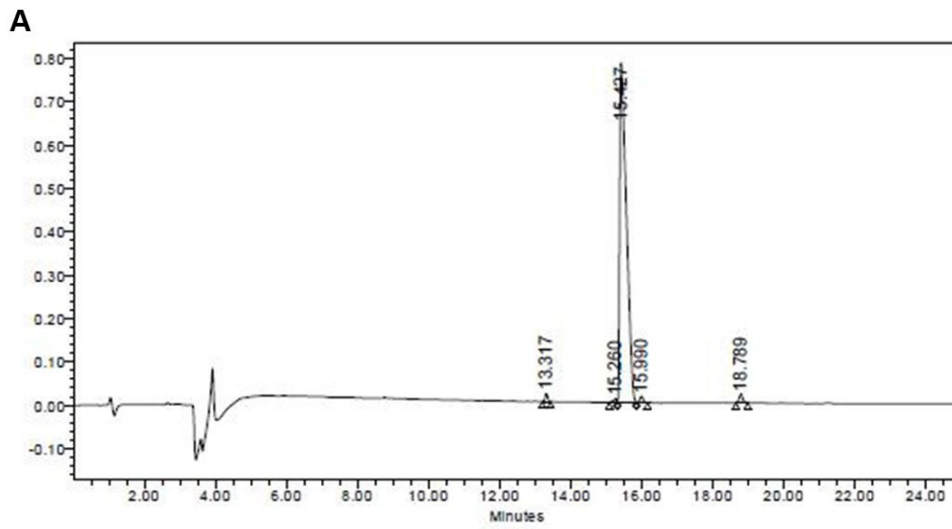

|   | RT     | Area     | % Area | Height |
|---|--------|----------|--------|--------|
| 1 | 13.317 | 90768    | 0.86   | 18677  |
| 2 | 15.260 | 56514    | 0.54   | 8614   |
| 3 | 15.427 | 10187362 | 96.49  | 799034 |
| 4 | 15.990 | 92962    | 0.88   | 14082  |
| 5 | 18.789 | 130512   | 1.24   | 18537  |

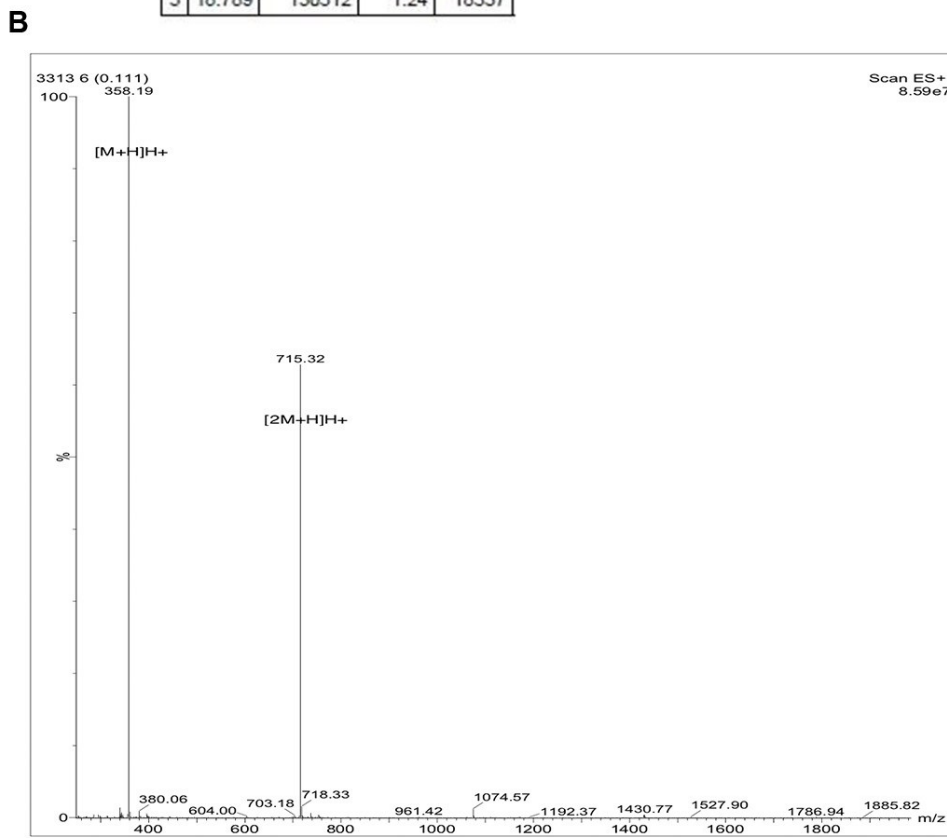

Figure S5. Analytical HPLC (A) and ESI-MS (B) of gelator <sub>L</sub>-LLL.



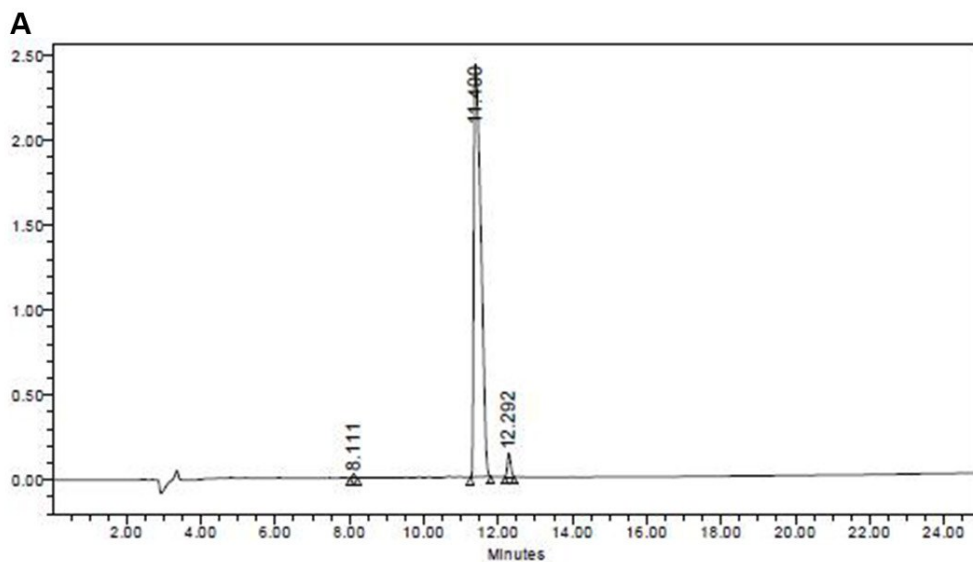

| RT | Area     | % Area | Height  |
|----|----------|--------|---------|
| 1  | 107216   | 0.32   | 20939   |
| 2  | 32057953 | 97.12  | 2430203 |
| 3  | 844792   | 2.56   | 139884  |

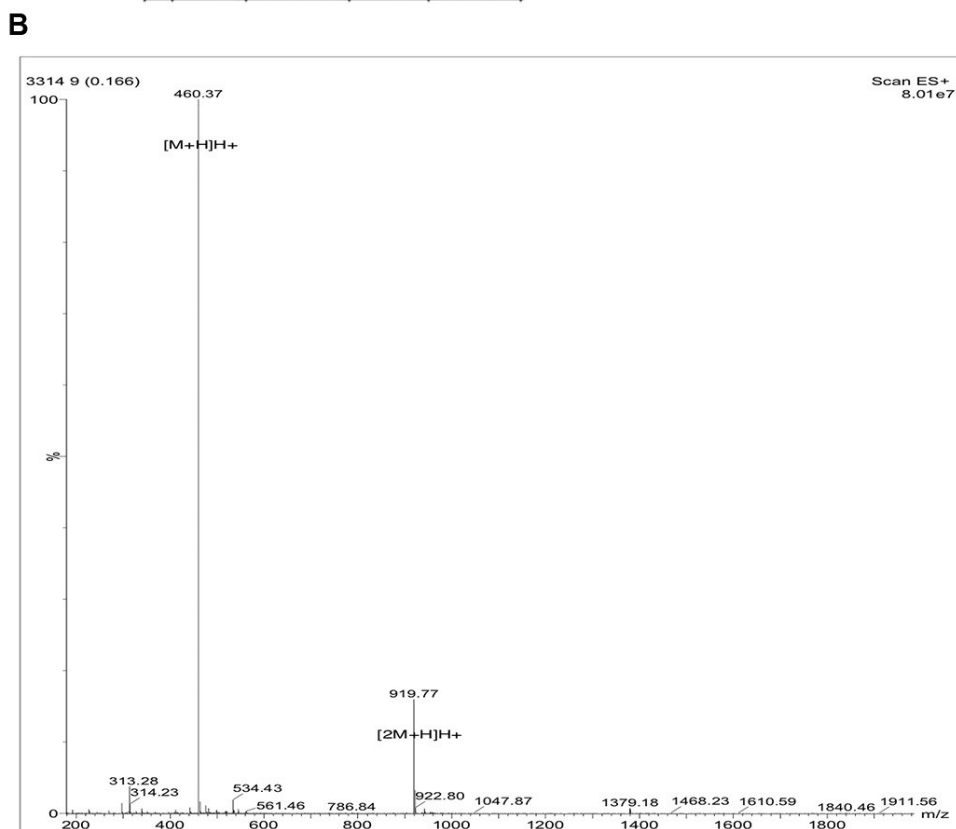

Figure S6. Analytical HPLC (A) and ESI-MS (B) of gelator <sub>L</sub>-FFF.

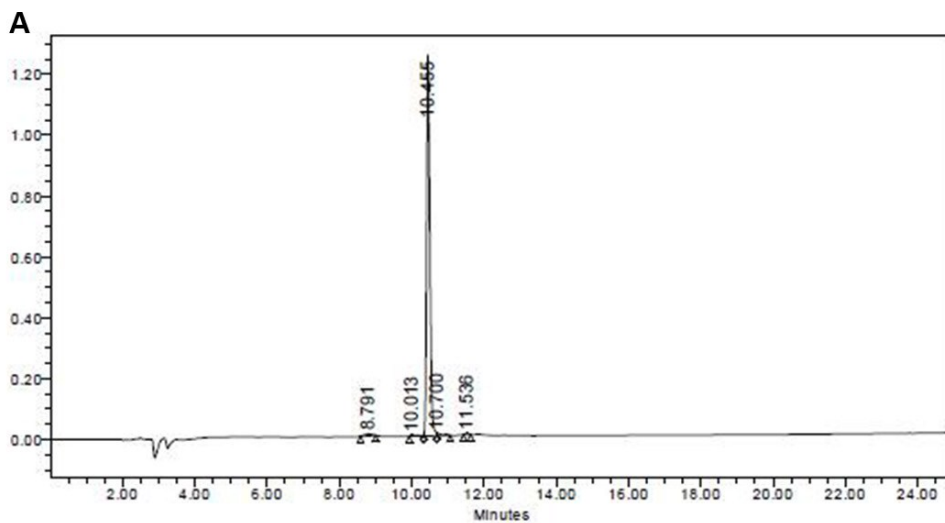

|   | RT     | Area    | % Area | Height  |
|---|--------|---------|--------|---------|
| 1 | 8.791  | 103237  | 1.28   | 6963    |
| 2 | 10.013 | 59962   | 0.75   | 5689    |
| 3 | 10.455 | 7755915 | 96.49  | 1249279 |
| 4 | 10.700 | 83807   | 1.04   | 10249   |
| 5 | 11.536 | 35346   | 0.44   | 6126    |

**B**

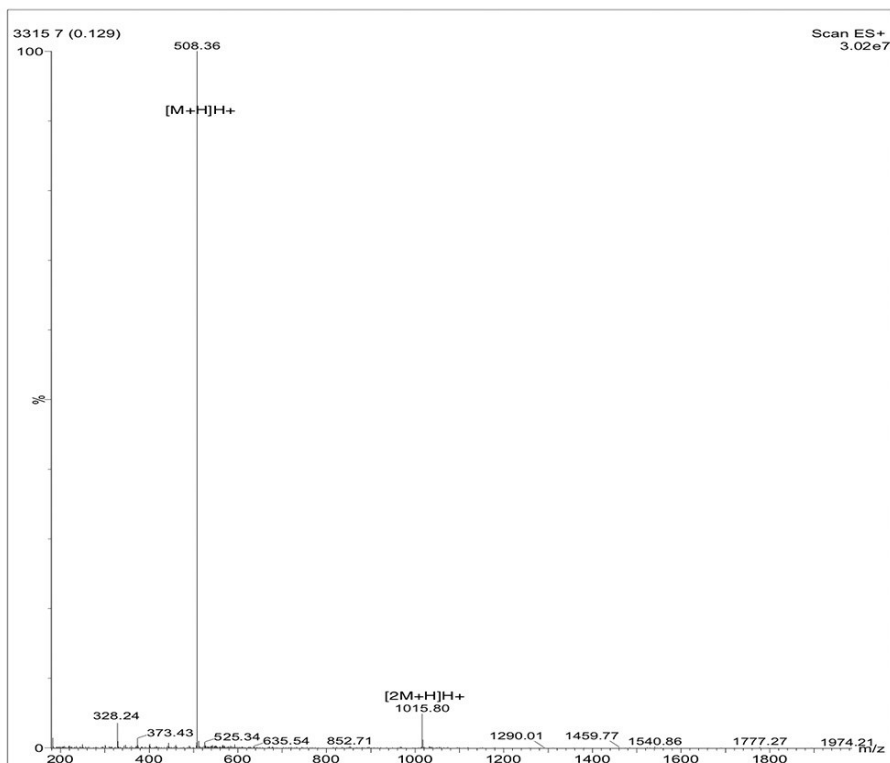

Figure S7. Analytical HPLC (A) and ESI-MS (B) of gelator  $L$ -YYY.

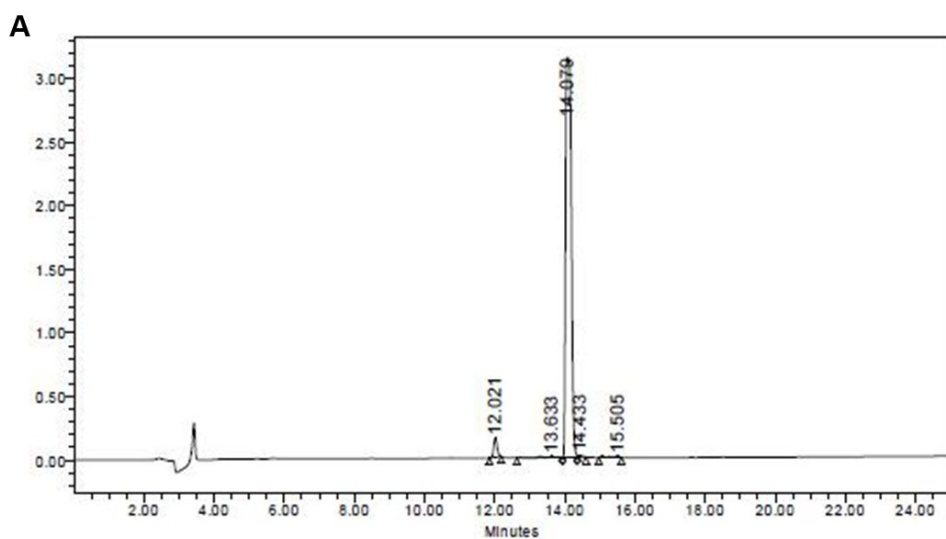

|   | RT     | Area     | % Area | Height  |
|---|--------|----------|--------|---------|
| 1 | 12.021 | 1037008  | 2.78   | 155080  |
| 2 | 13.633 | 216373   | 0.58   | 12166   |
| 3 | 14.079 | 35714726 | 95.61  | 3192719 |
| 4 | 14.433 | 131372   | 0.35   | 14714   |
| 5 | 15.505 | 255131   | 0.68   | 17334   |

**B**

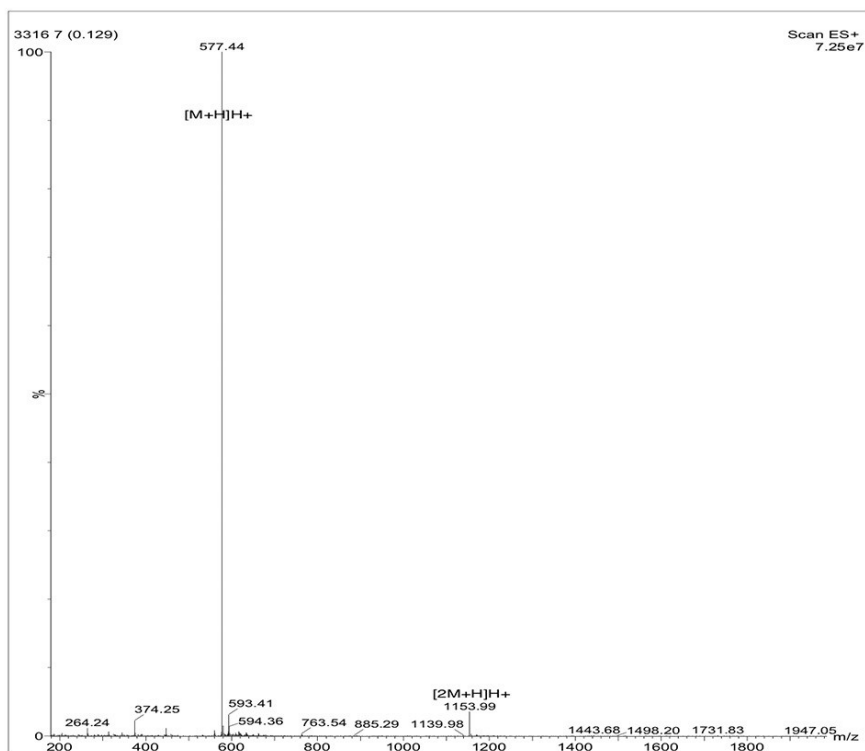

Figure S8. Analytical HPLC (A) and ESI-MS (B) of gelator<sub>L</sub>-WWW.

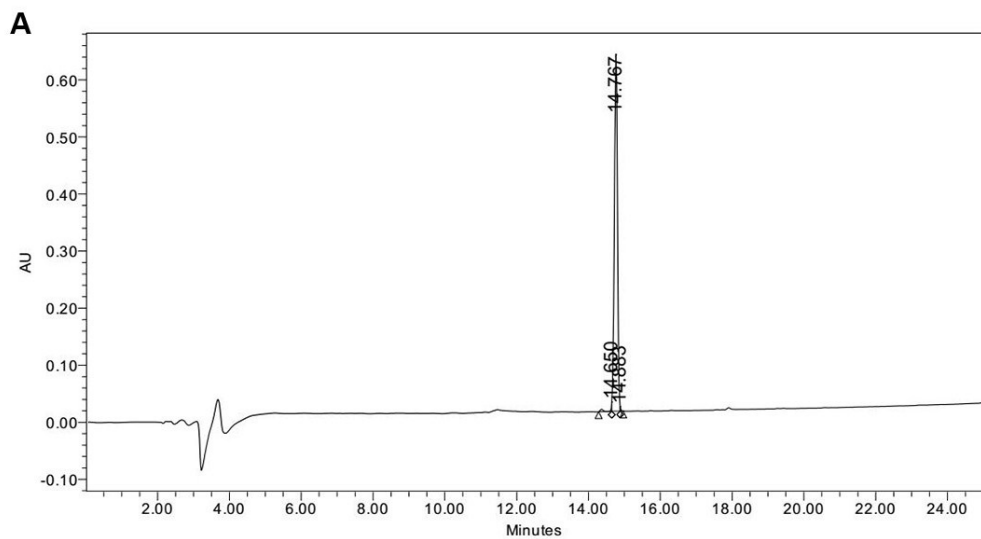

|   | RT     | Area    | % Area | Height |
|---|--------|---------|--------|--------|
| 1 | 14.650 | 37943   | 1.01   | 16438  |
| 2 | 14.767 | 3724240 | 98.75  | 621500 |
| 3 | 14.883 | 9270    | 0.25   | 7907   |

**B**

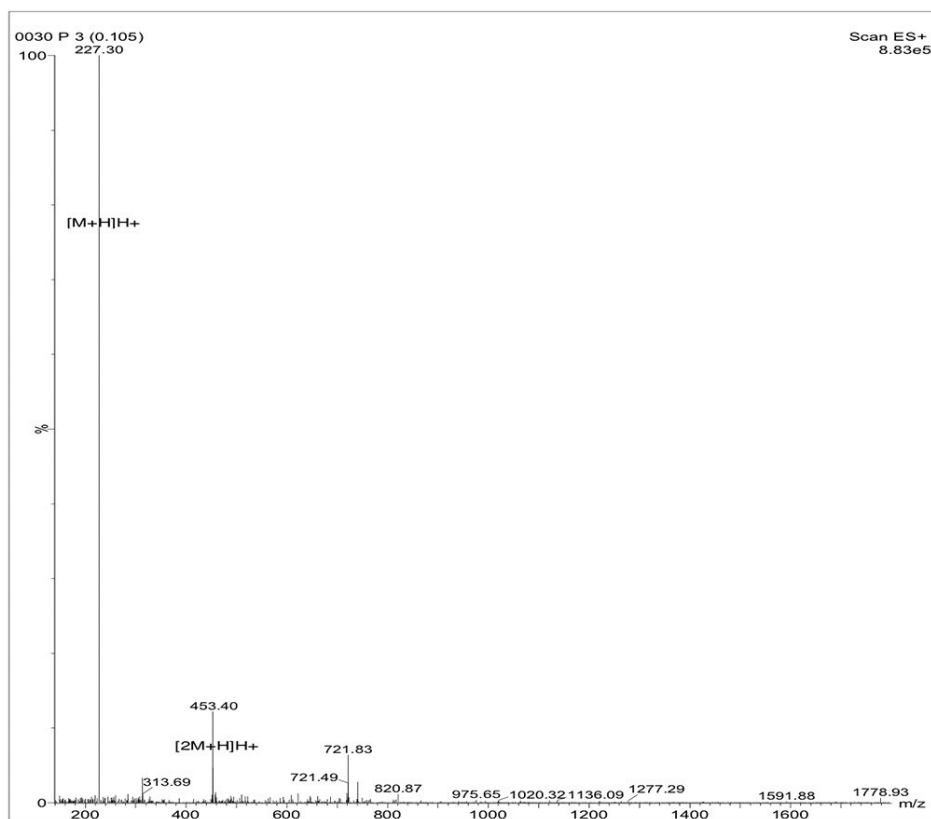

Figure S9. Analytical HPLC (A) and ESI-MS (B) of gelator C<sub>L</sub>-LL.

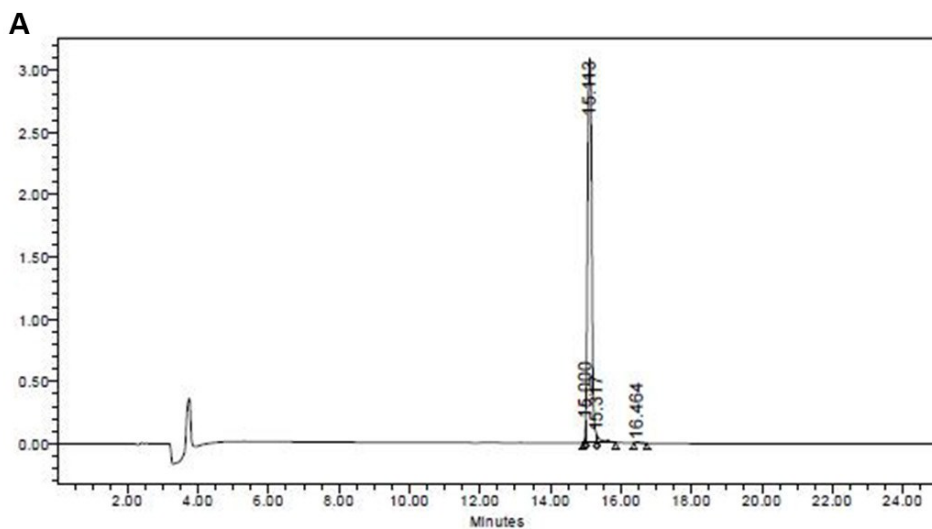

|   | RT     | Area     | % Area | Height  |
|---|--------|----------|--------|---------|
| 1 | 15.000 | 159591   | 0.61   | 171024  |
| 2 | 15.113 | 25477484 | 97.17  | 3103086 |
| 3 | 15.317 | 506389   | 1.93   | 62345   |
| 4 | 16.464 | 75694    | 0.29   | 9654    |

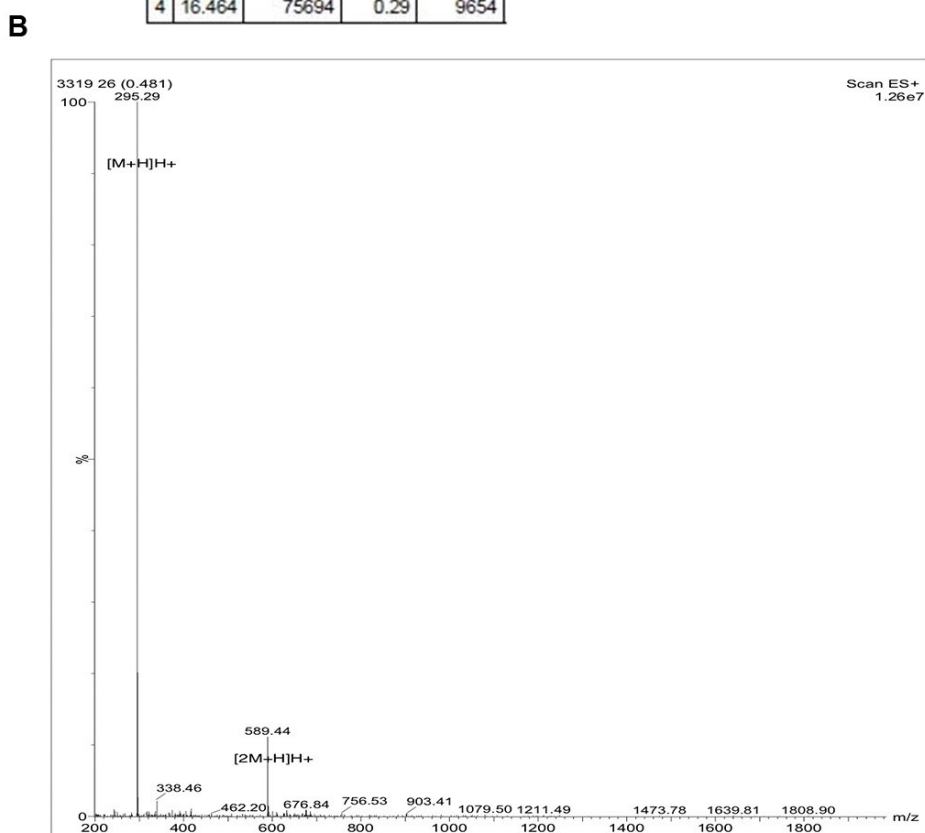

Figure S10. Analytical HPLC (A) and ESI-MS (B) of gelator C<sub>L</sub>-FF.

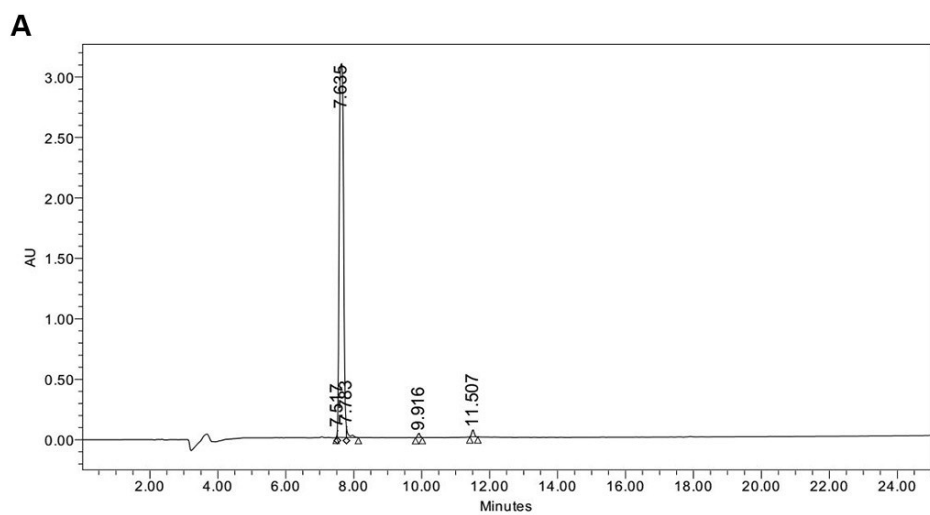

|   | RT     | Area     | % Area | Height  |
|---|--------|----------|--------|---------|
| 1 | 7.517  | 38809    | 0.14   | 55461   |
| 2 | 7.635  | 26905773 | 96.97  | 3099128 |
| 3 | 7.783  | 333382   | 1.20   | 87193   |
| 4 | 9.916  | 168348   | 0.61   | 33623   |
| 5 | 11.507 | 299331   | 1.08   | 57173   |

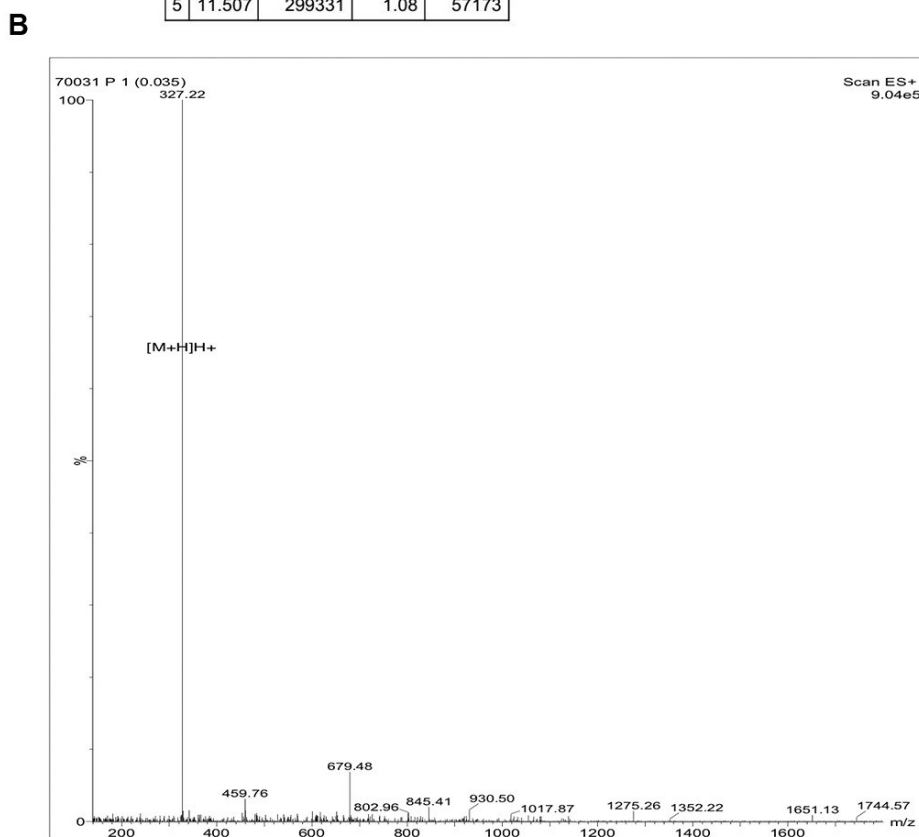

Figure S11. Analytical HPLC (A) and ESI-MS (B) of gelator C<sub>L</sub>-YY.

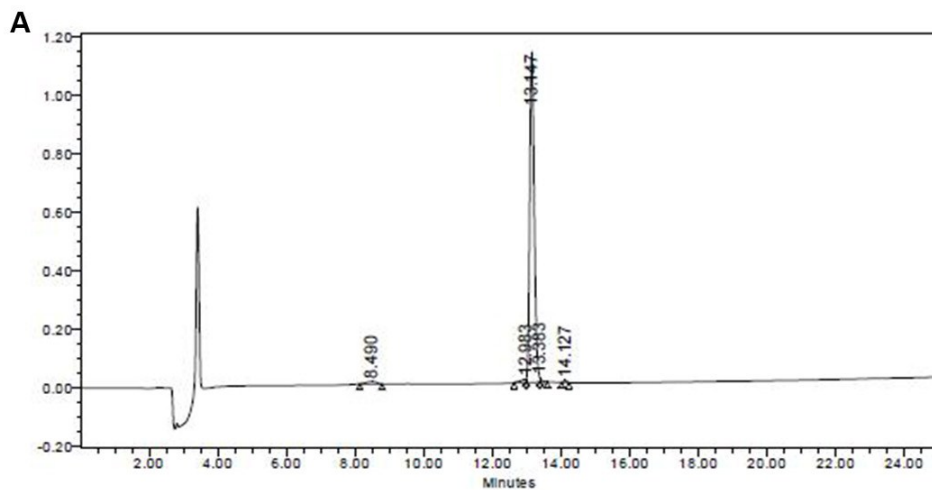

|   | RT     | Area     | % Area | Height  |
|---|--------|----------|--------|---------|
| 1 | 8.490  | 167156   | 1.56   | 8345    |
| 2 | 12.983 | 117286   | 1.10   | 11202   |
| 3 | 13.147 | 10314699 | 96.42  | 1126074 |
| 4 | 13.383 | 52911    | 0.49   | 15540   |
| 5 | 14.127 | 45298    | 0.42   | 7875    |

**B**

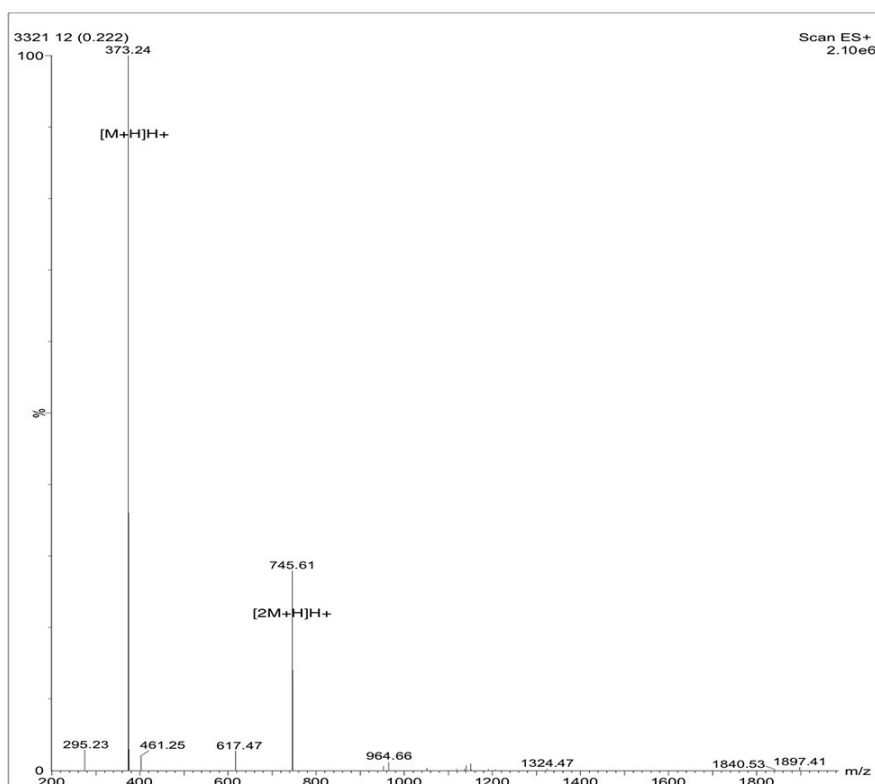

Figure S12. Analytical HPLC (A) and ESI-MS (B) of gelator C<sub>L</sub>-WW.

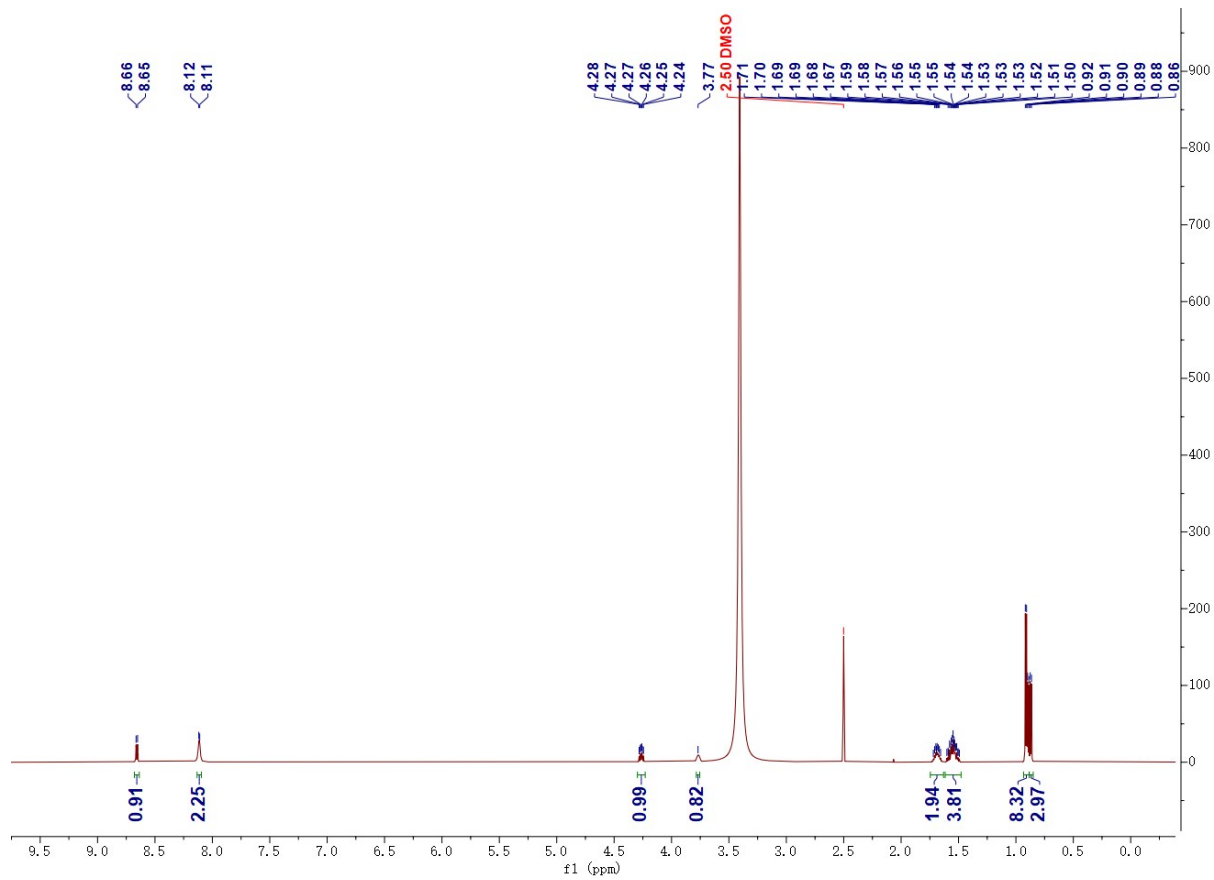

Figure S13: <sup>1</sup>H-NMR (600 MHz, DMSO-*d*<sub>6</sub>) of L-LL.



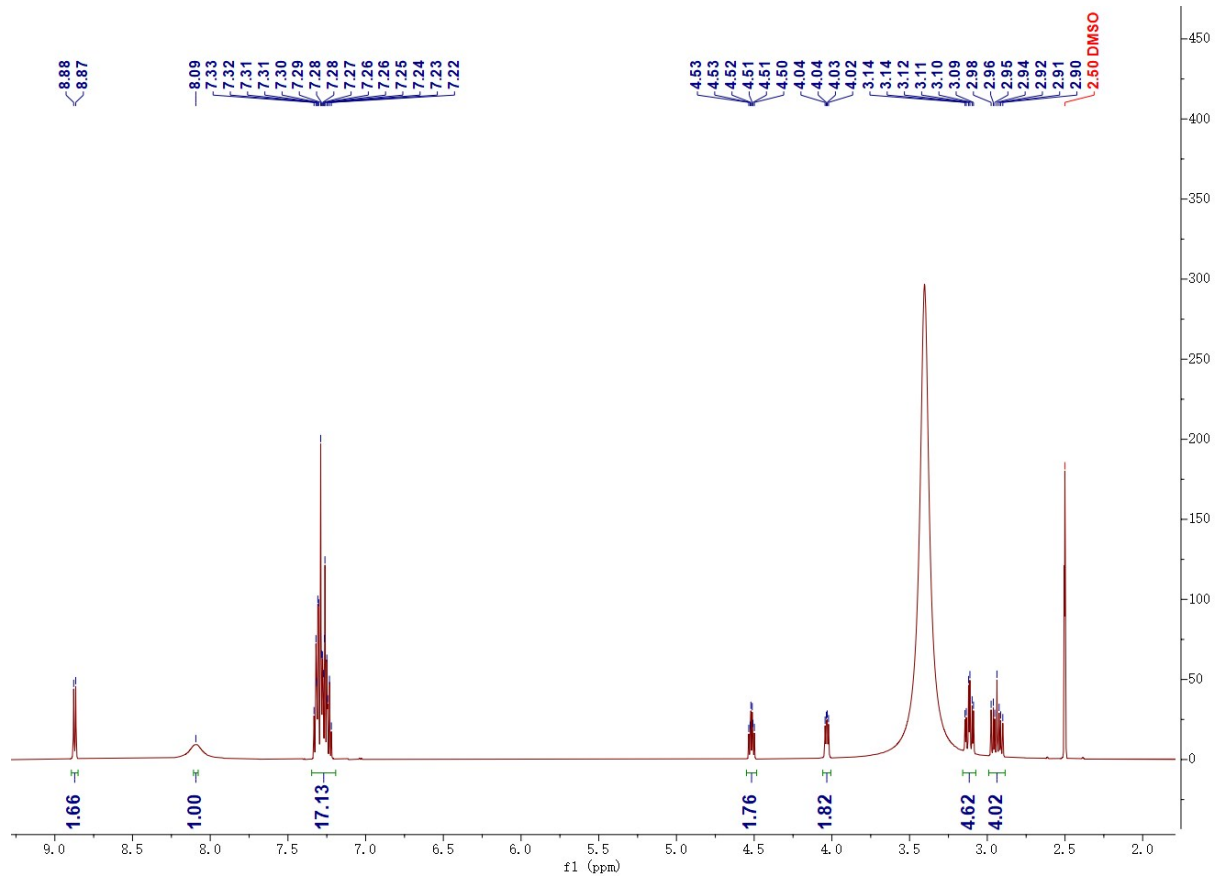

Figure S14:  $^1\text{H-NMR}$  (600 MHz,  $\text{DMSO-}d_6$ ) of  $\text{L-FF}$ .

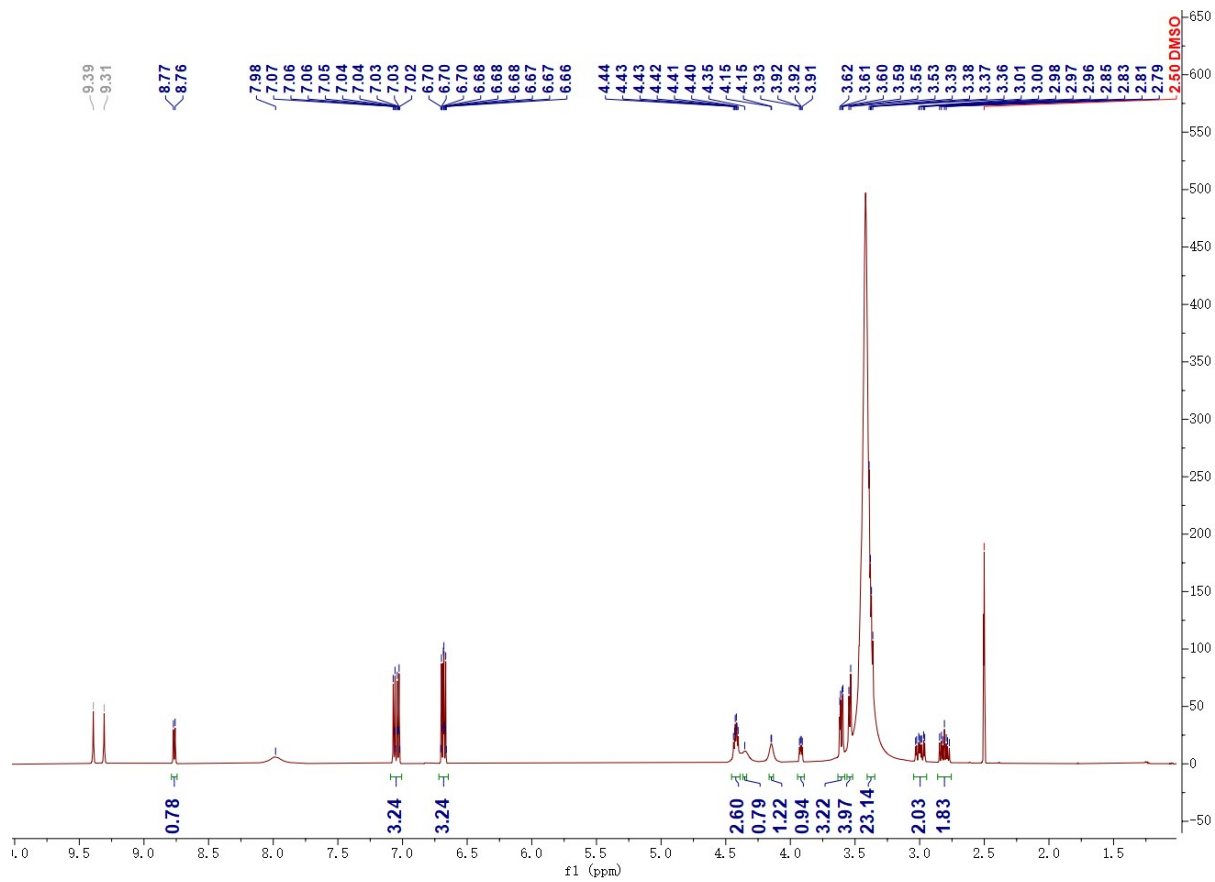

Figure S15:  $^1\text{H-NMR}$  (600 MHz,  $\text{DMSO-}d_6$ ) of  $\text{L-YY}$ .

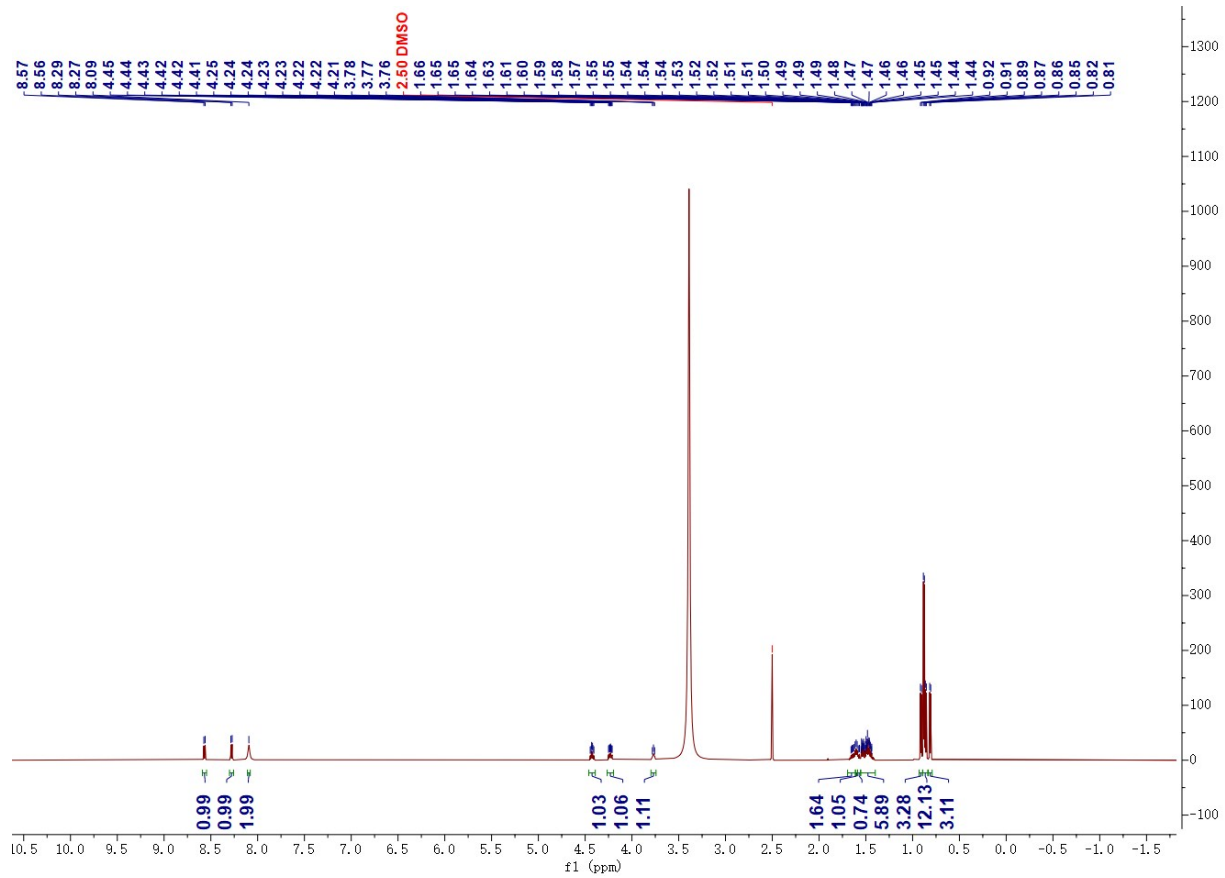

Figure S16:  $^1\text{H-NMR}$  (600 MHz,  $\text{DMSO-}d_6$ ) of  $\text{L-LLL}$ .

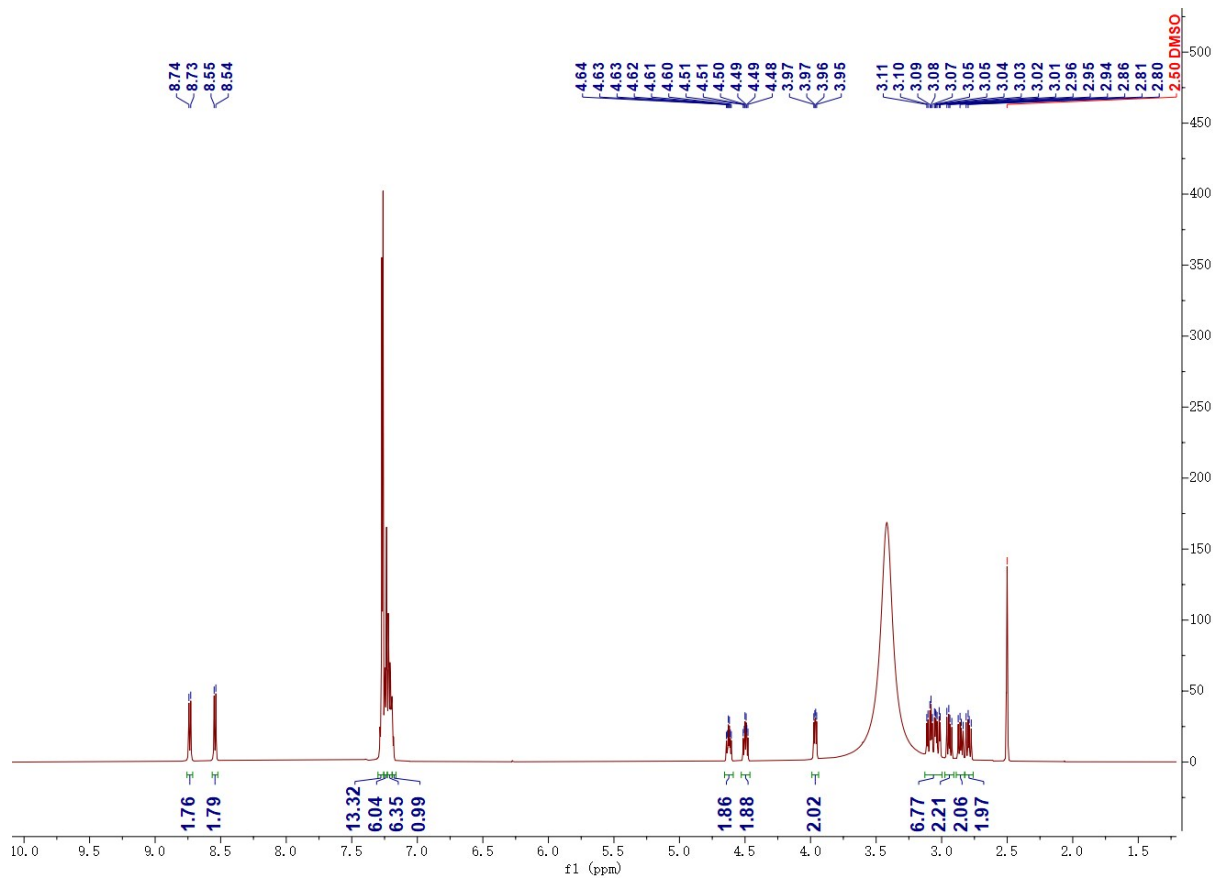

Figure S17:  $^1\text{H-NMR}$  (600 MHz,  $\text{DMSO-}d_6$ ) of  $\text{L-FFF}$ .

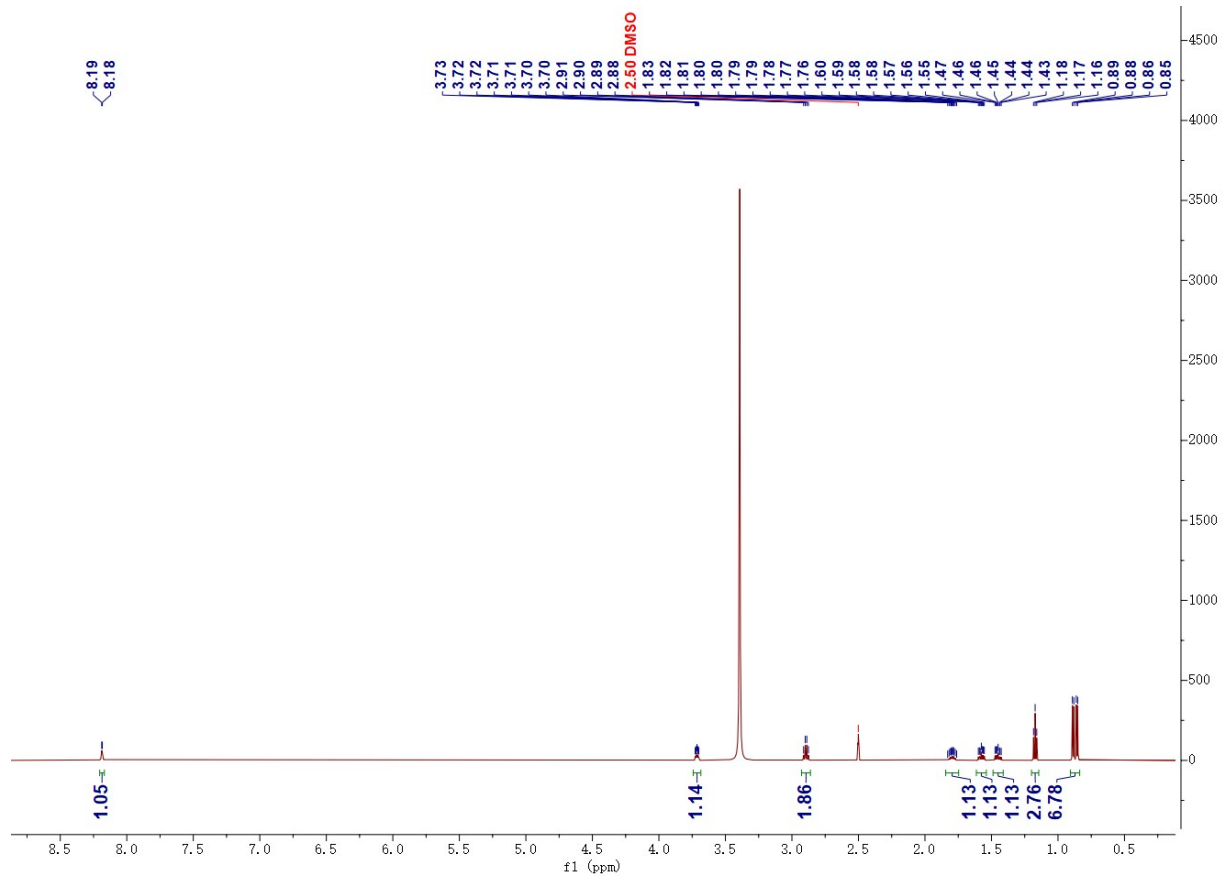

Figure S18:  $^1\text{H-NMR}$  (600 MHz,  $\text{DMSO-}d_6$ ) of  $c\text{-L-LL}$ .

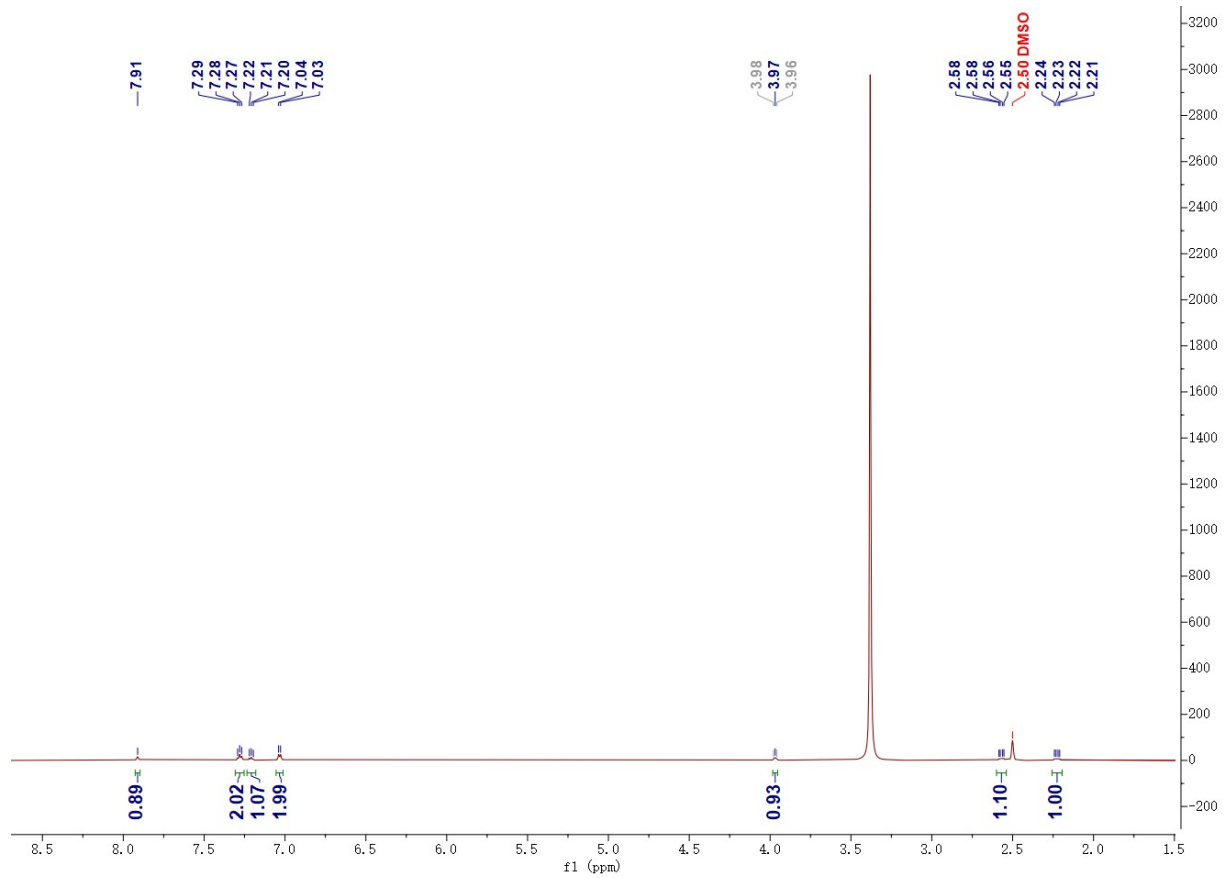

Figure S19: <sup>1</sup>H-NMR (600 MHz, DMSO-*d*<sub>6</sub>) of c-L-FF.

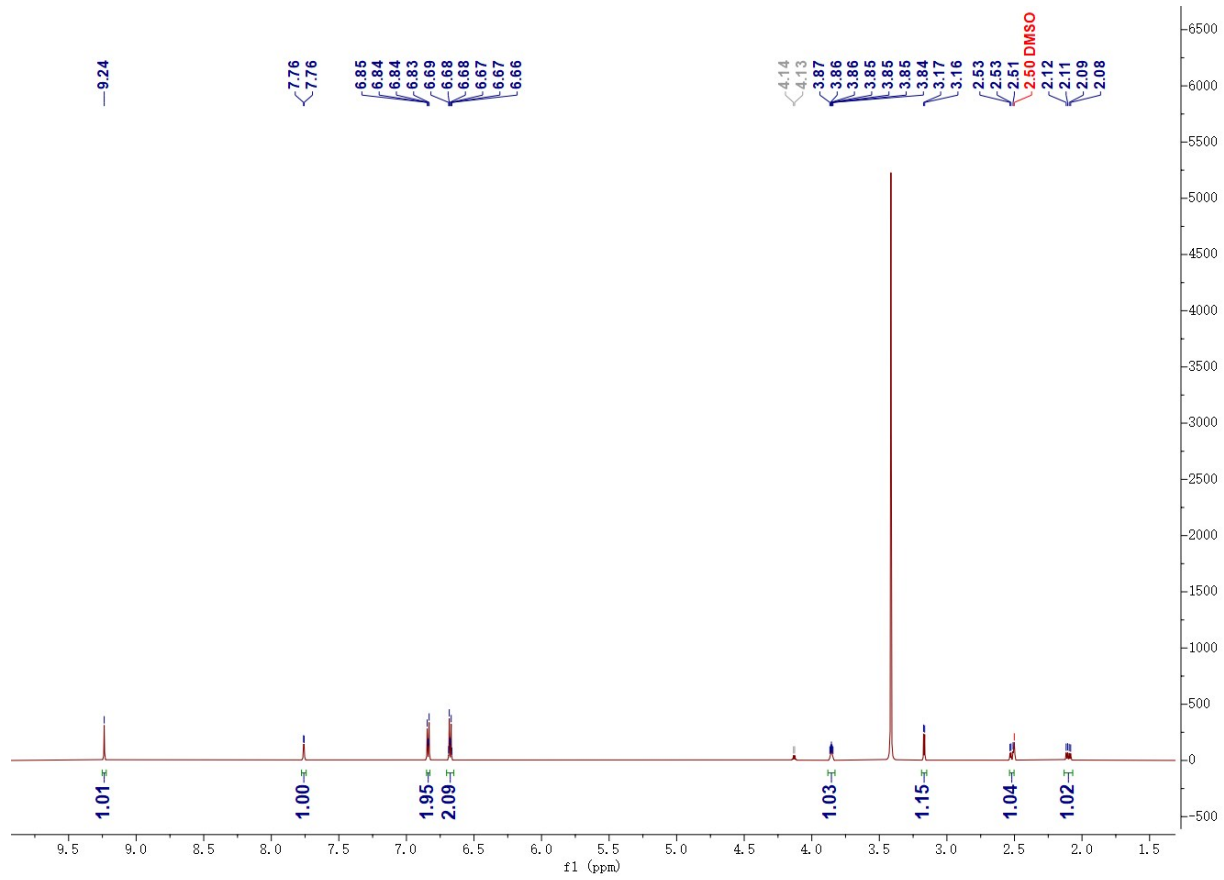

Figure S20:  $^1\text{H-NMR}$  (600 MHz,  $\text{DMSO-}d_6$ ) of  $c\text{-L-YY}$ .

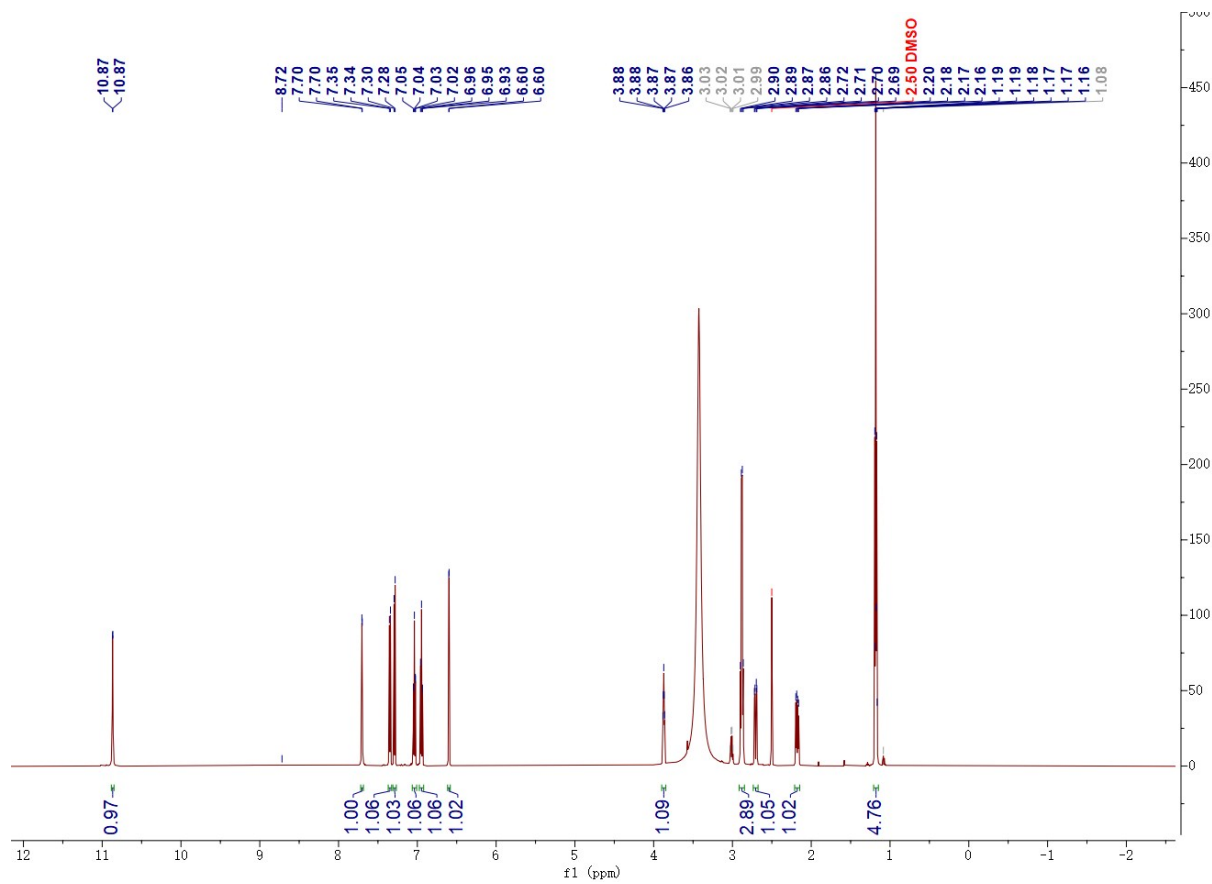

Figure S21:  $^1\text{H-NMR}$  (600 MHz,  $\text{DMSO-}d_6$ ) of  $c\text{-L-WW}$ .
